# Supplementary material
Source: Elsevier journal article supplement (https://www.sciencedirect.com/science/article/pii/S2529849622001046)
Supplement: mmc1 [file S2529849622001046:mmc1.doc]

**Supplemental Materials**

Supplementary Table S1. The risk of bias assessment of included studies using the ROBINS-I (Risk of Bias in Non-randomized Studies of Interventions) tool

Supplementary Table S2. Pooling statistics for outcome: adverse events

Supplementary Fig. S1 Subgroup analysis: forest plots of the accuracy of lead placement between IMG guided and MER guided DBS according to DBS targeting sites

Supplementary Fig. S2 Subgroup analysis: postoperative UPDRS-III improvement % between IMG and MER guided DBS according to targeting sites

| **Author** | **Confounding** | **Selection**  **of participants** | **Bias in classification of interventions** | **Deviations from intended interventions** | **Missing data** | **Measurement of outcomes** | **Selection of the reported result** | **Overall risk of bias** |
| --- | --- | --- | --- | --- | --- | --- | --- | --- |
| Bezchlibnyk 202020 |  |  |  |  |  |  |  | Moderate |
| Lee 201810 |  |  |  |  |  |  |  | Low |
| Chen 201823 |  |  |  |  |  |  |  | Moderate |
| Liu 201721 |  |  |  |  |  |  |  | Moderate |
| Brodsky 201722 |  |  |  |  |  |  |  | Low |
| Saleh 201619 |  |  |  |  |  |  |  | Low |

**Supplementary Table S1.** The risk of bias assessment of included studies using the ROBINS-I (Risk of Bias in Non-randomized Studies of Interventions) tool

Low risk Moderate risk Serious risk Critical risk

| **Outcomes** | ***Κ*** | **No. of Pts**  **(IMG guided DBS)** | **No. of Pts**  **(MER guided DBS)** | **No. of Events**  **(IMG guided DBS)** | **No. of Events**  **(MER guided DBS)** | **RR [95% CI]** | ***p* Value** | **Heterogeneity** |
| --- | --- | --- | --- | --- | --- | --- | --- | --- |
| Asymptomatic hemorrhage | 3 | 132 | 131 | 3 | 5 | 0.56[0.09,3.29] | 0.64 | Tau² = 0.14; Chi² = 2.12, P = 0.35; I² = 6% |
| deep vein thrombosis | 3 | 88 | 51 | 2 | 1 | 0.88[0.14,5.38] | 0.89 | Tau² = 0.00; Chi² = 0.73, P = 0.69; I² = 0% |
| Seizure | 3 | 112 | 139 | 2 | 1 | 1.77[0.29,11.04] | 0.62 | Tau² = 0.00; Chi² = 1.20, P = 0.55; I² = 0% |
| Gait difficulty | 4 | 147 | 92 | 40 | 16 | 1.10[0.64,1.90] | 0.72 | Tau² = 0.00; Chi² = 2.12, P = 0.55; I² = 0% |
| Speech disturbance | 2 | 31 | 103 | 31 | 11 | 0.81[0.47,1.42] | 0.47 | Tau² = 0.00; Chi² = 0.06, P = 0.81); I² = 0% |
| ischemic infarct | 2 | 44 | 66 | 1 | 1 | 1.42[0.15,13.20] | 0.76 | Tau² = 0.00; Chi² = 0.76, P = 0.38; I² = 0% |
| Hypomania | 2 | 103 | 30 | 2 | 2 | 0.31[0.02,2.52] | 0.43 | Tau² = 2.00; Chi² = 1.86, P = 0.17; I² = 46% |
| Scalp erosion | 2 | 71 | 55 | 4 | 0 | 3.27[0.38,27.84] | 0.28 | Tau² = 0.00; Chi² = 0.02, P = 0.89; I² = 0% |
| Infection | 4 | 155 | 155 | 4 | 5 | 0.65[0.19,2.30] | 0.51 | Tau² = 0.00; Chi² = 2.07, P = 0.56; I² = 0% |
| Dysphagia | 1 | 14 | 23 | 4 | 5 | 1.31[0.42,4.09] | 0.64 | Nil |
| lead revision,  fracture or reposition | 7 | 279 | 199 | 7 | 9 | 0.49[0.19,1.24] | 0.13 | Tau² = 0.00; Chi² = 3.46, P = 0.75; I² = 0% |

**Supplementary Table S2.** Pooling statistics for outcome: adverse events

Abbreviations: DBS = deep brain stimulation, IMG = intraoperative imaging, MER = microelectrodes recording


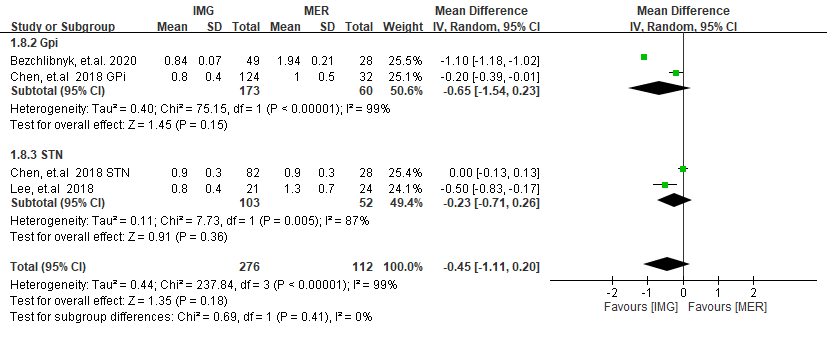


**Supplementary** **Fig. S1** Subgroup analysis: forest plots of the accuracy of lead placement between IMG guided and MER guided DBS according to targeting site (STN = subthalamic nucleus, GPi = globus pallidus pars interna)


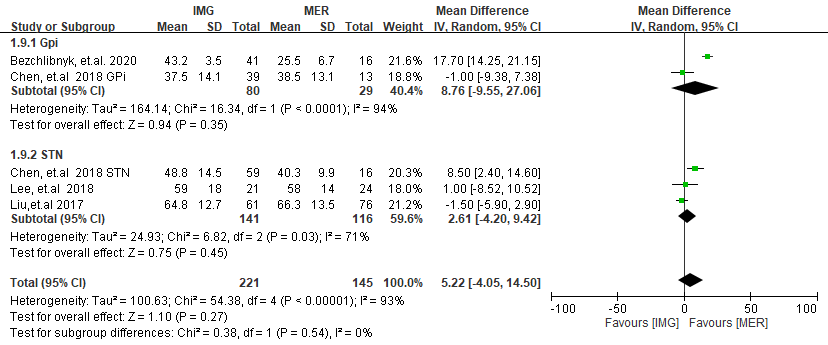


**Supplementary** **Fig. S2** Subgroup analysis: postoperative UPDRS-III improvement % between IMG and MER guided DBS according to targeting site (STN = subthalamic nucleus, GPi = globus pallidus pars interna)
